# Supplementary material for: In situ synthesis of polymer grafted ZIFs and application in mixed matrix membrane for CO2 separation
Source: Royal Society of Chemistry journal article supplement (doi:10.1039/c7ta10322k), 2018-01-01
Supplement: c7ta10322k1.pdf [file c7ta10322k1.pdf]

## Supporting Information

### Mixed Matrix Membranes Incorporating a Facile In Situ Synthesized PEI-g-ZIF-8 for CO<sub>2</sub> Separation

*Yongqiang Gao,<sup>□</sup> Zhihua Qiao,<sup>□</sup> Song Zhao,\* Zhi Wang, Jixiao Wang*

Chemical Engineering Research Center, School of Chemical Engineering and  
Technology, Tianjin University, Tianjin 300072, PR China

Tianjin Key Laboratory of Membrane Science and Desalination Technology, Tianjin  
300072, PR China

State Key Laboratory of Chemical Engineering (Tianjin University), Collaborative  
Innovation Center of Chemical Science and Engineering, Tianjin 300072, PR China

---

<sup>□</sup> Y.Q. Gao and Z.H. Qiao contribute equally. \* Corresponding author at: School of Chemical Engineering and Technology, Tianjin University, Weijin Road 92#, Nankai District, Tianjin 300072, PR China. Tel.: +86 02227404533. Fax: +86 02227890515. *E-mail address:* [songzhao@tju.edu.cn](mailto:songzhao@tju.edu.cn) (Song Zhao).

Figure S1 shows the FTIR spectra of PEI, ZIF-8 and PEI-g-ZIF-8 nanoparticles. The peak at  $1340\text{ cm}^{-1}$  in the curve of PEI belongs to the in-plane bending vibration of methenyl C-H. The characteristic absorption peak of ZIF-8 at  $421\text{ cm}^{-1}$ , attributing to Zn-N stretch vibration mode, was observed in the curves of both ZIF-8 and PEI-g-ZIF-8. It is worth pointing out that the Zn-N bond characteristic peak of PEI-g-ZIF-8 is weaker than that of ZIF-8, owing to the alleviated formation of Zn-mim-Zn bonds when crystal cells connect together. The wide absorption bands in the range of  $650$  to  $1500\text{ cm}^{-1}$  can be attributed to the vibration modes of the imidazolate in ZIF-8<sup>1</sup>. In the curve of PEI-g-ZIF-8 spectrum, the weak doublet at  $813$  and  $833\text{ cm}^{-1}$  belongs to the N-H bending and wagging vibration of primary amino groups, owing to the extra primary amino groups in the PEI chains exposed on the surface of PEI-g-ZIF-8 nanoparticles, while no such doublet can be observed in the ZIF-8 curve. In addition, there is a characteristic peak at  $3277\text{ cm}^{-1}$  (N-H stretching vibration of primary and secondary amino groups) and a weak peak at  $3348\text{ cm}^{-1}$  (doublet for N-H stretching vibration of primary amino groups) in the absorption bands of PEI but no such peaks for ZIF-8. After modified by PEI, a new broad peak at  $3237\text{ cm}^{-1}$  in the absorption bands of PEI-g-ZIF-8 is observed, indicating that PEI chains are grafted into the ZIF-8 nanoparticles. Another proof is that the peak at  $1381\text{ cm}^{-1}$ , attributing to methylene groups of PEI, becomes stronger in PEI-g-ZIF-8 curve compared with ZIF-8.

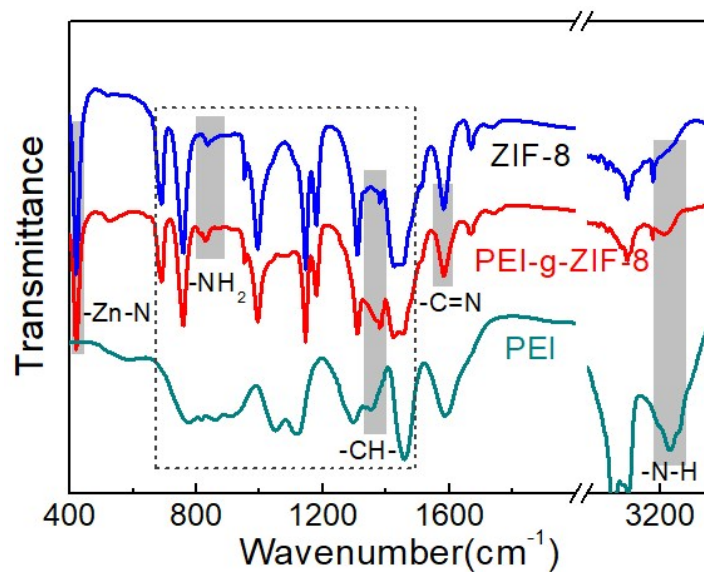

**Figure S1.** FTIR spectra of PEI, ZIF-8 and PEI-g-ZIF-8 nanoparticles.

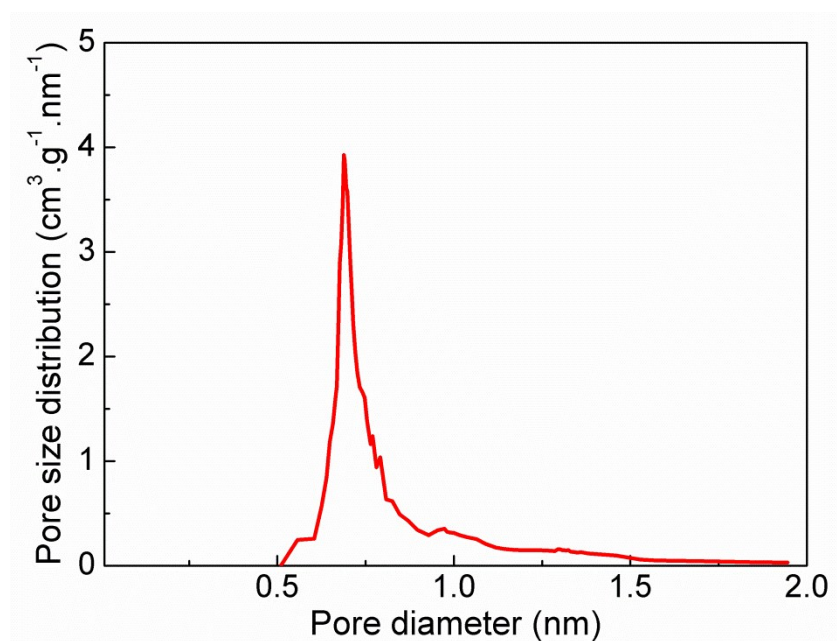

**Figure S2.** The pore size distribution of PEI-g-ZIF-8 nanoparticles.

The FTIR spectroscopy was also investigated to examine the change of film surface functionalities. Figure S2 shows the FTIR spectra of PVAm film and PVAm/PEI-g-ZIF-8 film in the frequency region from 650  $\text{cm}^{-1}$  to 3000  $\text{cm}^{-1}$ . Peaks in the spectrum of the PVAm/PEI-g-ZIF-8 film combine the characteristic bands of both PEI-g-ZIF-8

and PVAm. On one hand, compared with the characteristic peak at 833  $\text{cm}^{-1}$  for PEI-g-ZIF-8, the peak slightly shifts to 814  $\text{cm}^{-1}$  for PVAm/PEI-g-ZIF-8 film, demonstrating the formation of hydrogen bond between PEI-g-ZIF-8 and PVAm chains. On the other hand, the strong sharp peak at 1585  $\text{cm}^{-1}$  for PEI-g-ZIF-8 and a similar peak at 1566  $\text{cm}^{-1}$  for PVAm/PEI-g-ZIF-8 film could be attributed to the C=N vibration mode, also indicating an increased amount of hydrogen bond.

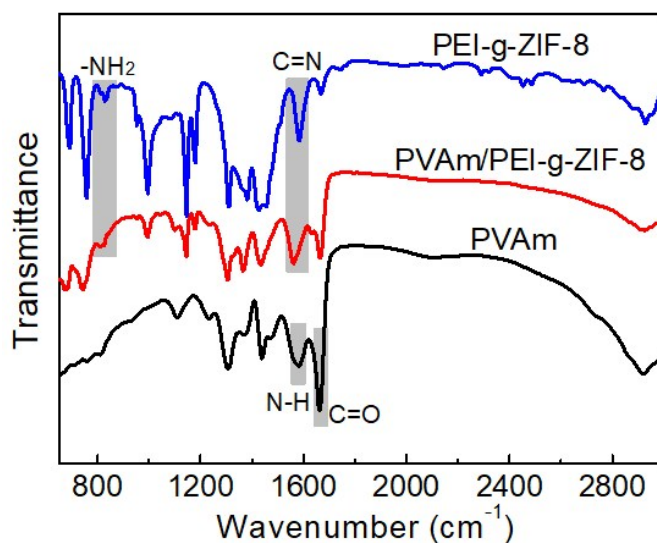

**Figure S3.** FTIR spectra of PEI-g-ZIF-8 nanoparticles, PVAm film and PVAm/PEI-g-ZIF-8 film.

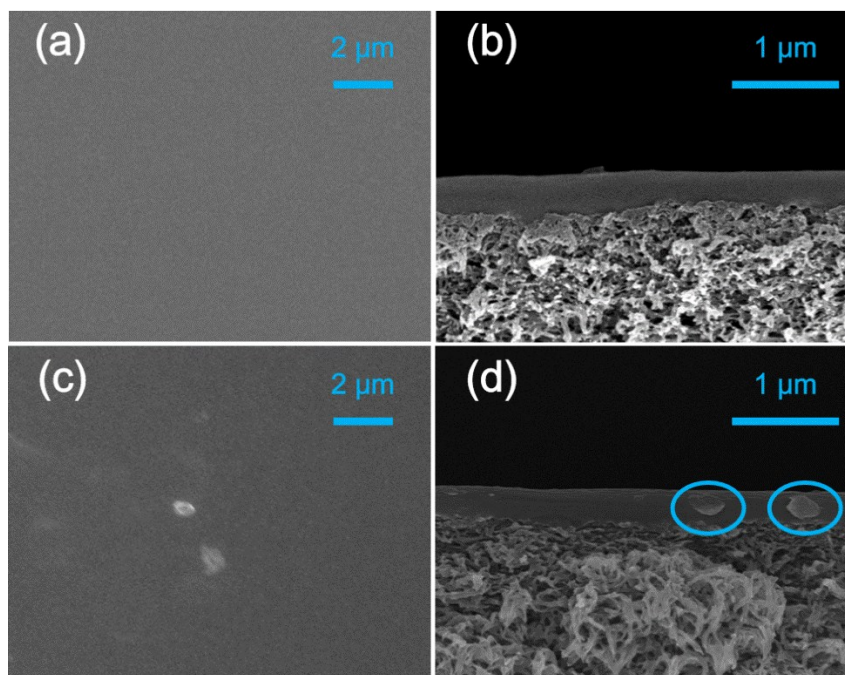

**Figure S4.** Surface and cross sectional SEM images of PVAm/mPSf (a, b) and PVAm/ZIF-8/mPSf (c, d) membranes. Wet coating thickness: 100  $\mu\text{m}$ .  $MP_{NPs}$ : 20.0 wt%.

In this work, we employed three different contents of PEI and made a comparison of the separation performance of their corresponding MMMs under 0.30 MPa feed gas pressure. The PEI-g-ZIF-8 nanoparticles were denoted as PEI-g-ZIF-8(5:40:0.5), PEI-g-ZIF-8(5:40:1) and PEI-g-ZIF-8(5:40:2) with the molar ratios of  $\text{Zn}(\text{NO}_3)_2 \cdot 6\text{H}_2\text{O}$ , Hmim and PEI as 5:40:0.5, 5:40:1 and 5:40:2, respectively. As can be seen from Table S1, the MMMs fabricated by using PEI-g-ZIF-8(5:40:1) nanoparticles have the highest separation performance. Compared with the MMMs fabricated by using PEI-g-ZIF-8(5:40:1), the  $\text{CO}_2$  permeance and  $\text{CO}_2/\text{N}_2$  selectivity of the MMMs fabricated by using PEI-g-ZIF-8(5:40:0.5) decreased by 18.4% and 18.0% respectively, while the MMMs by using PEI-g-ZIF-8(5:40:2) resulted 21.6% and 23.3% decrease of  $\text{CO}_2$  permeance and  $\text{CO}_2/\text{N}_2$  selectivity, respectively. On one hand, a smaller amount of PEI is insufficient to improve the  $\text{CO}_2$  absorption and permeate property for PEI-g-ZIF-8 nanoparticles. On the other hand, since the porous structure of ZIFs is sensitive to the ligand content, an excessive mass of PEI may

partly block the pores, resulting in the decrease of membrane separation performance. Thus, in this work we chose the optimal molar ratio of  $Zn^{2+}$ :Hmim:PEI as 5:40:1 to synthesize PEI-g-ZIF-8 nanoparticles.

**Table S1** Separation performance of PVAm/PEI-g-ZIF-8/mPSf membranes using PEI-g-ZIF-8 nanoparticles synthesized with different molar ratios of  $Zn(NO_3)_2 \cdot 6H_2O$ , Hmim and PEI. Wet coating thickness for the MMMs: 100  $\mu m$ .  $MP_{NPs}$ : 16.7 wt%.

| Molar ratio<br>( $Zn^{2+}$ :Hmim:PEI) | PEI-g-ZIF-8           | PVAm/PEI-g-ZIF-8/mPSf membranes |                                             |
|---------------------------------------|-----------------------|---------------------------------|---------------------------------------------|
|                                       |                       | CO <sub>2</sub> permeance       | CO <sub>2</sub> /N <sub>2</sub> selectivity |
| 5:40:0.5                              | PEI-g-ZIF-8(5:40:0.5) | 1624 $\pm$ 132                  | 65.5 $\pm$ 1.9                              |
| 5:40:1                                | PEI-g-ZIF-8(5:40:1)   | 1990 $\pm$ 148                  | 79.9 $\pm$ 2.0                              |
| 5:40:2                                | PEI-g-ZIF-8(5:40:2)   | 1560 $\pm$ 150                  | 61.3 $\pm$ 2.4                              |

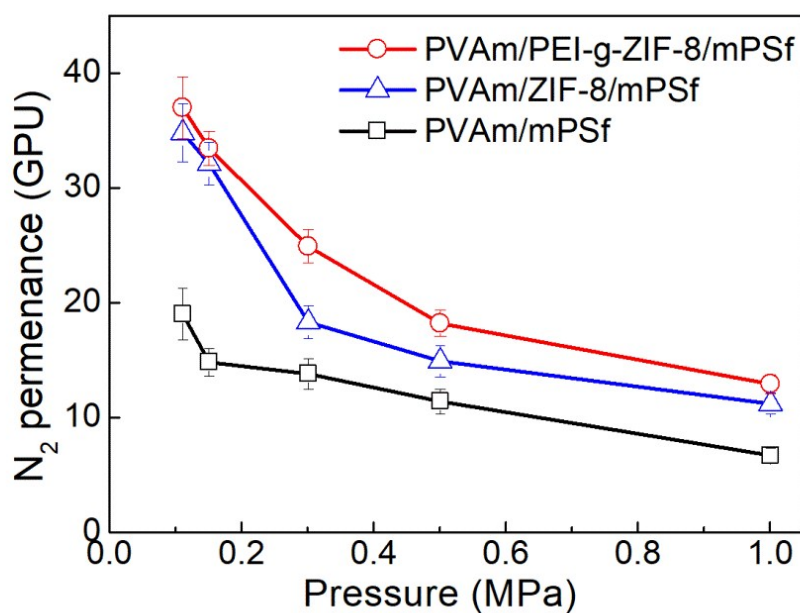

**Figure S5.** N<sub>2</sub> permeance of different MMMs based on mPSf substrate. Wet coating thickness for MMMs: 100  $\mu m$ .  $MP_{NPs}$ : 16.7 wt%. Feed gas: CO<sub>2</sub>/N<sub>2</sub> (15/85 vol.%) mixed gas. Feed gas pressure: 0.30 MPa.

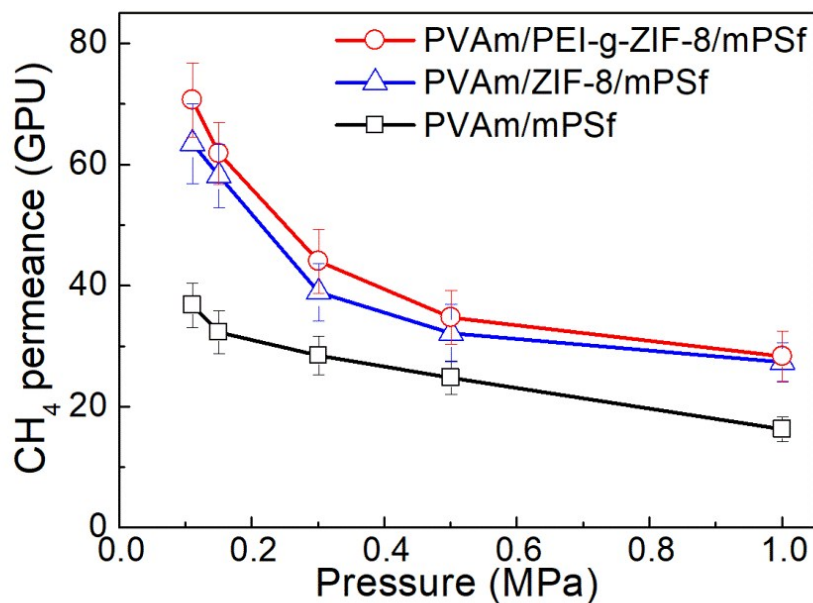

**Figure S6.** CH<sub>4</sub> permeance of different MMMs based on mPSf substrate. Wet coating thickness for MMMs: 100 μm.  $MP_{NPS}$ : 16.7 wt%. Feed gas: CO<sub>2</sub>/CH<sub>4</sub> (10/90 vol.%) mixed gas. Feed gas pressure: 0.30 MPa.

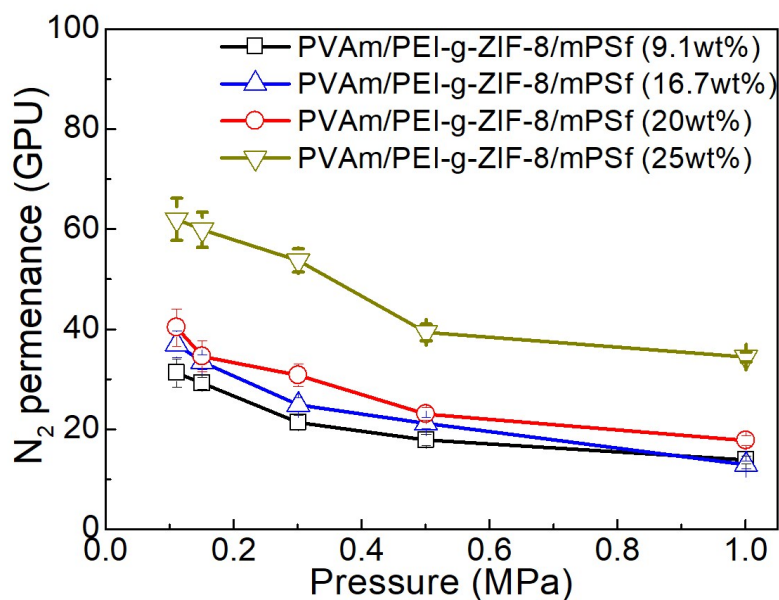

**Figure S7.** N<sub>2</sub> permeance of MMMs with different PEI-g-ZIF-8 loadings. Wet coating thickness for MMMs: 100 μm. Feed gas: CO<sub>2</sub>/N<sub>2</sub> (15/85 vol.%) mixed gas. Feed gas pressure: 0.30 MPa.

## Literature Cited

1. A. Samadi-Maybodi, S. Ghasemi and H. Ghaffari-Rad, *Sensors and Actuators B-Chemical*, 2015, **220**, 627-633.
